# Supplementary material
Source: publisher site journal article supplement (https://www.dovepress.com/article/513067)
Supplement: Supplementary file 1 [file Supplementary%20materials_1_1_1.docx]

**Table S1. Confirmatory factor analysis**

| **Indicators** | **Reference** | **Actual** |
| --- | --- | --- |
| CMIN/DF | 1-3: Excellent, 3-5: Good | 3.639 |
| RMSEA | <0.08: Good | 0.071 |
| IFI | >0.8: Good | 0.847 |
| TLI | >0.8: Good | 0.833 |
| CFI | >0.8: Good | 0.846 |

Note(s): This table presents the model fit indices for the CFA evaluating the latent structure of the KAP instrument. Acceptable thresholds are shown for reference. The model demonstrates a good fit, with all indices approaching recommended values.
CMIN/DF: chi-square/degrees of freedom ratio; RMSEA: Root Mean Square Error of Approximation; IFI: Incremental Fit Index; TLI: Tucker–Lewis Index; CFI: Comparative Fit Index.

**Table S2. Knowledge Section**

|  | **N (%)** | | |
| --- | --- | --- | --- |
| **Well-known** | **Partially Known** | **Unknown** |
| 1. Perimenopausal syndrome, often referred to as "menopausal symptoms," is caused by physical or psychological symptoms due to fluctuations or reductions in sex hormones before and after menopause. | 323 (62.12) | 180 (34.62) | 17 (3.27) |
| 2. Menopause is a natural physiological process that every woman experiences, and perimenopausal syndrome typically occurs in women aged 40 to 59. | 374 (71.92) | 140 (26.92) | 6 (1.15) |
| 3. The primary cause of perimenopausal syndrome is the declining ovarian function that occurs with age. | 360 (69.23) | 149 (28.65) | 11 (2.12) |
| 4. Do you understand that the main symptoms of perimenopausal syndrome include menstrual irregularities, vasomotor symptoms (such as hot flashes, chills, headaches, palpitations, etc.), psychological symptoms (such as irritability, emotional instability, memory decline, sleep disturbances, etc.), and other physical symptoms (such as decreased bone density, muscle soreness, etc.)? | 338 (65.00) | 169 (32.50) | 13 (2.50) |
| 5. Do you understand that HRT can be administered orally, topically, or vaginally? | 225 (43.27) | 255 (49.04) | 40 (7.69) |
| 6. Do you understand that HRT can alleviate vasomotor symptoms? | 312 (60.00) | 173 (33.27) | 35 (6.73) |
| 7. Do you understand that HRT can help prevent osteoporosis? | 301 (57.88) | 160 (30.77) | 59 (11.35) |
| 8. Do you understand that HRT can alleviate atrophy of the urogenital system? | 253 (48.65) | 193 (37.12) | 74 (14.23) |
| 9. Do you understand that HRT can help prevent cardiovascular diseases? | 255 (49.04) | 176 (33.85) | 89 (17.12) |
| 10. Do you understand that HRT may help prevent endometrial hyperplasia or carcinoma? | 183 (35.19) | 214 (41.15) | 123 (23.65) |
| 11. Do you understand that HRT may potentially lead to side effects such as uterine bleeding, breast tenderness, and blood clots? | 146 (28.08) | 249 (47.88) | 125 (24.04) |
| 12. Do you understand that HRT may lead to weight gain? | 160 (30.77) | 228 (43.85) | 132 (25.38) |
| 13. Do you understand that HRT may increase the risk of breast cancer? | 210 (40.38) | 199 (38.27) | 111 (21.35) |

Note(s): Participants’ responses are categorized as “Well-known,” “Partially Known,” or “Unknown” for each knowledge item. This table highlights understanding of perimenopausal syndrome, hormone replacement therapy (HRT) benefits, delivery modes, and potential risks.**Table S3. Attitude Section**

|  | **N (%)** | | | | |
| --- | --- | --- | --- | --- | --- |
| **Strongly Agree** | **Agree** | **Neutral** | **Disagree** | **Strongly Disagree** |
| 1. I have a full understanding of the benefits of HRT for perimenopausal syndrome. | 158 (30.38) | 255 (49.04) | 102 (19.62) | 3 (0.58) | 2 (0.38) |
| 2. After receiving HRT, I have experienced a significant improvement in my physical condition (e.g., hot flashes, chills, muscle soreness, etc.). | 164 (31.54) | 278 (53.46) | 72 (13.85) | 5 (0.96) | 1 (0.19) |
| 3. After receiving HRT, my psychological condition (e.g., irritability, emotional instability, etc.) has significantly improved. | 134 (25.77) | 273 (52.50) | 98 (18.85) | 12 (2.31) | 3 (0.58) |
| 4. After receiving HRT, my quality of life has significantly improved. | 136 (26.15) | 281 (54.04) | 96 (18.46) | 6 (1.15) | 1 (0.19) |
| 5. I have a full understanding of the potential risks associated with HRT for perimenopausal syndrome. | 99 (19.04) | 232 (44.62) | 163 (31.35) | 24 (4.62) | 2 (0.38) |
| 6. The potential risks of HRT make me feel concerned. | 39 (7.50) | 157 (30.19) | 198 (38.08) | 117 (22.50) | 9 (1.73) |
| 7. I am concerned that HRT may have addictive properties. | 29 (5.58) | 156 (30.00) | 153 (29.42) | 158 (30.38) | 24 (4.62) |
| 8. I believe HRT is more effective than non-hormonal drug treatments. | 92 (17.69) | 253 (48.65) | 156 (30.00) | 16 (3.08) | 3 (0.58) |
| 9. I believe HRT is safer than non-hormonal drug treatments. | 63 (12.12) | 184 (35.38) | 240 (46.15) | 30 (5.77) | 3 (0.58) |
| 10. I believe that maintaining adequate communication with a doctor is necessary during the HRT process. | 242 (46.54) | 244 (46.92) | 28 (5.38) | 3 (0.58) | 3 (0.58) |

Note(s): Each item was rated on a 5-point Likert scale, ranging from “Strongly Agree” to “Strongly Disagree.” This table illustrates participants’ perceptions regarding HRT efficacy, risks, safety, and the importance of communication with healthcare providers.

**Table S4. Practice Section**

|  | **N (%)** | | | | |
| --- | --- | --- | --- | --- | --- |
| **Yes** | **No** |  |  |  |
| 1. Do you sometimes forget to take your medication? | 267 (51.35) | 253 (48.65) |  |  |  |
| 2. In the past two weeks, have you forgotten to take your medication for one or more days? | 122 (23.46) | 398 (76.54) |  |  |  |
| 3. During treatment, have you ever reduced your medication dosage or stopped taking the medication without informing your doctor when you felt your symptoms worsening or experiencing other symptoms? | 118 (22.69) | 402 (77.31) |  |  |  |
| 4. When you go on a trip or are away from home for an extended period, do you sometimes forget to carry your medication with you? | 127 (24.42) | 393 (75.58) |  |  |  |
| 5. Did you take your medication yesterday? | 423 (81.35) | 97 (18.65) |  |  |  |
| 6. Do you stop taking your medication when you feel your symptoms are under control? | 95 (18.27) | 425 (81.73) |  |  |  |
| 7. Do you find it challenging to adhere to the treatment plan? | 95 (18.27) | 425 (81.73) |  |  |  |
|  | Never | Occasionally | Sometimes | Often | Always |
| 8. Do you find it difficult to remember to take your medication on time and in the correct dosage? | 230 (44.23) | 250 (48.08) | 36 (6.92) | 3 (0.58) | 1 (0.19) |

Note(s): Practice items assessed participants’ medication adherence behaviors, including timing, consistency, and challenges. Items P1–P7 were binary (Yes/No), and P8 used a 5-point frequency scale from “Never” to “Always.”

**Table S5.** Regression for practice

|  | Univariate logistic regression | | Multivariate logistic regression | |
| --- | --- | --- | --- | --- |
| OR (95%CI) | P | OR (95%CI) | P |
| **Knowledge** | 1.061 (1.030-1.093) | <0.001 | 1.012 (0.975-1.050) | 0.525 |
| **Attitude** | 1.116 (1.074-1.159) | <0.001 | 1.105 (1.055-1.158) | <0.001 |
| **Age, years** |  |  |  |  |
| ≤50 | ref |  |  |  |
| >50 | 1.403 (0.989-1.991) | 0.058 |  |  |
| **Residence** |  |  |  |  |
| Rural | ref |  |  |  |
| Urban | 1.224 (0.760-1.972) | 0.405 |  |  |
| Suburban | 1.272 (0.641-2.523) | 0.492 |  |  |
| **Education** |  |  |  |  |
| Primary School and Below | ref |  |  |  |
| Junior High School | 0.854 (0.328-2.224) | 0.747 |  |  |
| High School/Technical Secondary School | 0.591 (0.228-1.528) | 0.277 |  |  |
| College and Above | 1.481 (0.341-6.425) | 0.600 |  |  |
| **Employment** |  |  |  |  |
| Employed | 0.783 (0.529-1.160) | 0.223 | 0.744 (0.495-1.119) | 0.155 |
| Unemployed | 0.609 (0.3380-0.978) | 0.040 | 0.656 (0.402-1.070) | 0.091 |
| Other | ref |  | ref |  |
| **Monthly income, Yuan** |  |  |  |  |
| <5000 | ref |  |  |  |
| 5000-10000 | 1.165 (0.725-1.874) | 0.528 |  |  |
| 10000-20000 | 1.085 (0.636-1.850) | 0.765 |  |  |
| >20000 | 1.067 (0.619-1.837) | 0.816 |  |  |
| **Underlying condition** |  |  |  |  |
| Yes | 0.838 (0.573-1.226) | 0.363 |  |  |
| No | ref |  |  |  |
| **Duration since disease diagnosed, years** |  |  |  |  |
| <1 | ref |  |  |  |
| 1-3 | 0.910 (0.585-1.414) | 0.674 |  |  |
| 3-5 | 1.354 (0.781-2.345) | 0.280 |  |  |
| >5 | 1.115 (0.651-1.911) | 0.692 |  |  |
| **Duration since HRT, years** |  |  |  |  |
| <1 | ref |  |  |  |
| 1-3 | 1.072 (0.715-1.608) | 0.735 |  |  |
| 3-5 | 1.248 (0.731-2.131) | 0.417 |  |  |
| >5 | 1.722 (0.953-3.114) | 0.072 |  |  |

Note(s): Odds ratios (ORs) and 95% confidence intervals (CIs) are reported for both univariate and multivariate logistic regression analyses. Variables with P < 0.05 in univariate analysis were entered into the multivariate model. Attitude remained an independent predictor of good practice behavior.

**Figure S1. Confirmatory factor analysis (CFA) model for knowledge, attitude, and practice items.**This CFA model demonstrates the factor loadings of all items onto their respective latent variables. The model supports construct validity of the KAP framework.


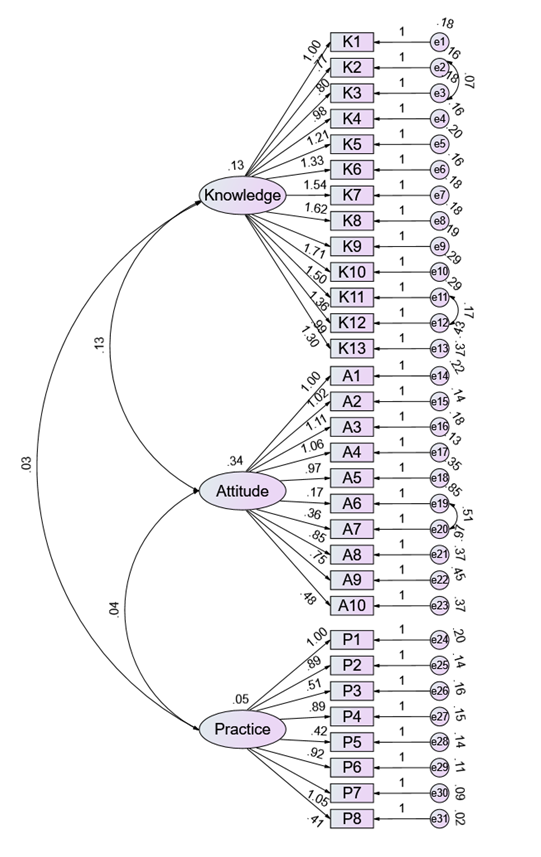


**Figure S2. Comparison of individual practice item responses between participants using HRT for >3 years and ≤3 years.**This figure shows the distribution of responses for each practice item, highlighting differences in specific behaviors such as medication adherence and travel-related practices.


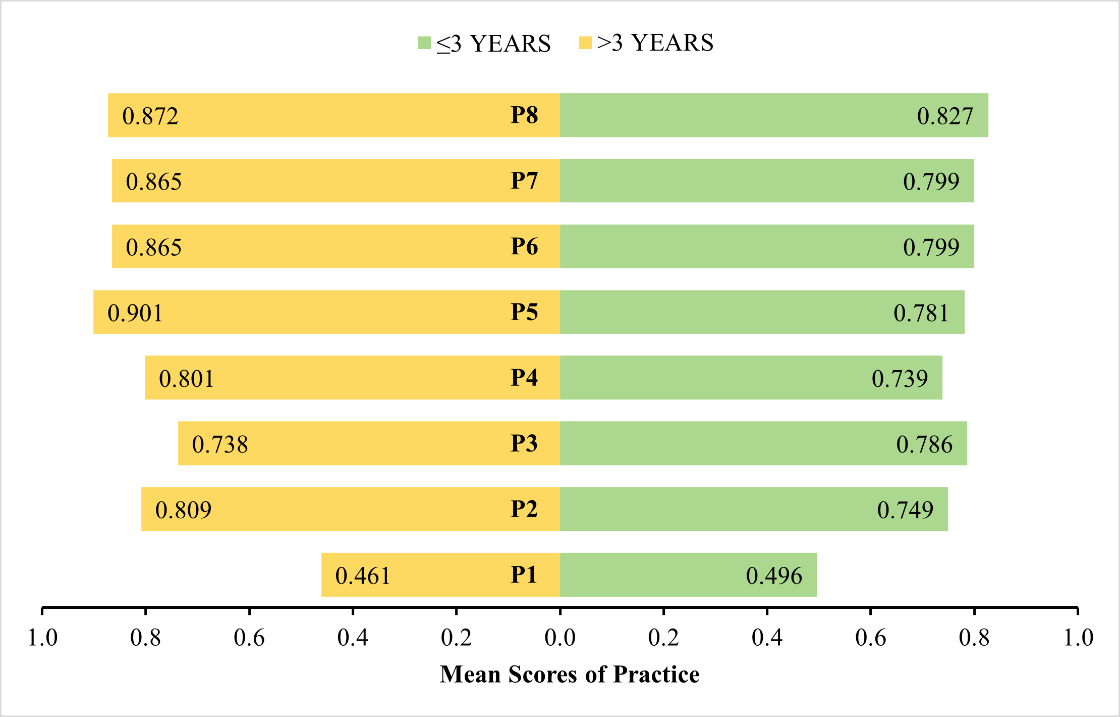


**Figure S3. Supplementary Questionnaire**

Dear Participants,

We are researchers from Quzhou People's Hospital, and we sincerely invite you to take part in our research project. This study aims to understand the knowledge, attitudes, and practices (KAP) of patients with menopausal syndrome regarding hormone replacement therapy. This will serve as a basis for developing scientific intervention strategies that may potentially benefit more individuals and improve their health. Your participation in this study is voluntary. If you agree to participate, please refer to the following instructions.

1. Please complete the questionnaire. Your answers are not judged as right or wrong; you only need to provide information based on your actual situation. If you have any questions during the process, feel free to ask, and please submit the completed questionnaire promptly.

2. This study is a simple questionnaire survey and will not harm your physical or mental well-being. However, it will involve some privacy-related questions such as your gender and age. We will strictly maintain confidentiality and will not disclose your information. Please feel confident in filling out the form.

3. As a participant, you can stay informed about the information related to this study and its progress. If you decide to withdraw from the study, please inform us, and your data will not be included in the research results.

Finally, we sincerely appreciate your valuable time and support for our scientific research!

□ I am aware of and agree to the use of the collected data for scientific research.

Basic Information

| **1.** **Your age:** | | years | | | | | | | | | | | | | |
| --- | --- | --- | --- | --- | --- | --- | --- | --- | --- | --- | --- | --- | --- | --- | --- |
| **2.** **Your place of residence:** | | a. Rural  b. Urban  c. Suburban | | | | | | | | | | | | | |
| **3.** **Your ethnicity:** | | a. Han  b. Minority ethnicity  If you belong to a minority ethnicity, please specify： | | | | | | | | | | | | | |
| **4.** **Your education level:** | | a. Elementary school or below  b. Middle school/High school/Technical school  c. College/Bachelor’s  d. Master's degree or higher | | | | | | | | | | | | | |
| **5.** **Your occupation type:** | | a. Regular employee  b. Part-time  c. Self-employed  d. Unemployed  e. Homemaker  f. Retired  g. Other: | | | | | | | | | | | | | |
| **6.** **In the past year, the monthly per capita income in your household (including in-kind income and rental income, etc.) was: _____ yuan** | | a.<5000  b.5000-10000  c.10000-20000  d.>20000 | | | | | | | | | | | | | |
| **7.** **Types of health insurance (multiple selections possible):** | | a. Urban Employee Basic Medical Insurance  b. New Rural Cooperative Medical Insurance  c. Urban Resident Basic Medical Insurance  d. Retired Cadre Medical Insurance  e. Commercial Insurance  f. No insurance | | | | | | | | | | | | | |
| **8.** **Do you have any of the following underlying medical conditions? (multiple selections possible):** | | a. Diabetes  b. Chronic Kidney Disease  c. Hypertension  d. No underlying medical conditions  e. Other | | | | | | | | | | | | | |
| **9.** **How long ago were you first diagnosed with menopausal syndrome?** | | a.<1 year  b.1-3 years  c.3-5 years  d.>5 years | | | | | | | | | | | | | |
| **10.** **How long have you been receiving hormone replacement therapy?** | | a.<1 year  b.1-3 years  c.3-5 years  d.>5 years | | | | | | | | | | | | | |
| **11.15*6=80** | | a. True  b. False | | | | | | | | | | | | | |
| **Please choose "well-known," "partially known," or "unknown" based on your knowledge of the issue.** | | | | | | | | | | | | | | | |
| **11. Menopausal syndrome, often referred to as "menopausal symptoms," is caused by physical or psychological symptoms due to fluctuations or reductions in sex hormones before and after menopause.** | | | | | | | **a. Well-known** | | | | | **b. Partially known** | | | **c. Unknown** |
| **12. Menopause is a natural physiological process that every woman experiences, and menopausal syndrome typically occurs in women aged 40 to 59.** | | | | | | | **a. Well-known** | | | | | **b. Partially known** | | | **c. Unknown** |
| **13. The primary cause of menopausal syndrome is the declining ovarian function that occurs with age.** | | | | | | | **a. Well-known** | | | | | **b. Partially known** | | | **c. Unknown** |
| **14. Do you understand that the main symptoms of menopausal syndrome include menstrual irregularities, vasomotor symptoms (such as hot flashes, chills, headaches, palpitations, etc.), psychological symptoms (such as irritability, emotional instability, memory decline, sleep disturbances, etc.), and other physical symptoms (such as decreased bone density, muscle soreness, etc.)?** | | | | | | | **a. Well-known** | | | | | **b. Partially known** | | | **c. Unknown** |
| **15. Do you understand that hormone replacement therapy can be administered orally, topically, or vaginally?** | | | | | | | **a. Well-known** | | | | | **b. Partially known** | | | **c. Unknown** |
| **16. Do you understand that hormone replacement therapy can alleviate vasomotor symptoms?** | | | | | | | **a. Well-known** | | | | | **b. Partially known** | | | **c. Unknown** |
| **17. Do you understand that hormone replacement therapy can help prevent osteoporosis?** | | | | | | | **a. Well-known** | | | | | **b. Partially known** | | | **c. Unknown** |
| **18. Do you understand that hormone replacement therapy can alleviate atrophy of the urogenital system?** | | | | | | | **a. Well-known** | | | | | **b. Partially known** | | | **c. Unknown** |
| **19. Do you understand that hormone replacement therapy can help prevent cardiovascular diseases?** | | | | | | | **a. Well-known** | | | | | **b. Partially known** | | | **c. Unknown** |
| **20. Do you understand that hormone replacement therapy may help prevent endometrial hyperplasia or carcinoma?** | | | | | | | **a. Well-known** | | | | | **b. Partially known** | | | **c. Unknown** |
| **21. Do you understand that hormone replacement therapy may potentially lead to side effects such as uterine bleeding, breast tenderness, and blood clots?** | | | | | | | **a. Well-known** | | | | | **b. Partially known** | | | **c. Unknown** |
| **22. Do you understand that hormone replacement therapy may lead to weight gain?** | | | | | | | **a. Well-known** | | | | | **b. Partially known** | | | **c. Unknown** |
| **23. Do you understand that hormone replacement therapy may increase the risk of breast cancer?** | | | | | | | **a. Well-known** | | | | | **b. Partially known** | | | **c. Unknown** |
| **Please select from "strongly agree" to "strongly disagree" depending on your agreement with the description in the question.** | | | | | | | | | | | | | | | |
| **24. I have a full understanding of the benefits of hormone replacement therapy for menopausal syndrome.** | **a. Strongly Agree** | | | | **b. Agree** | | | **c. Neutral** | | **d. Disagree** | | | | **e. Strongly Disagree** | |
| **25. After receiving hormone replacement therapy, I have experienced a significant improvement in my physical condition (e.g., hot flashes, chills, muscle soreness, etc.).** | **a. Strongly Agree** | | | | **b. Agree** | | | **c. Neutral** | | **d. Disagree** | | | | **e. Strongly Disagree** | |
| **26. After receiving hormone replacement therapy, my psychological condition (e.g., irritability, emotional instability, etc.) has significantly improved.** | **a. Strongly Agree** | | | | **b. Agree** | | | **c. Neutral** | | **d. Disagree** | | | | **e. Strongly Disagree** | |
| **27. After receiving hormone replacement therapy, my quality of life has significantly improved.** | **a. Strongly Agree** | | | | **b. Agree** | | | **c. Neutral** | | **d. Disagree** | | | | **e. Strongly Disagree** | |
| **28. I have a full understanding of the potential risks associated with hormone replacement therapy for menopausal syndrome.** | **a. Strongly Agree** | | | | **b. Agree** | | | **c. Neutral** | | **d. Disagree** | | | | **e. Strongly Disagree** | |
| **29. The potential risks of hormone replacement therapy make me feel concerned.** | **a. Strongly Agree** | | | | **b. Agree** | | | **c. Neutral** | | **d. Disagree** | | | | **e. Strongly Disagree** | |
| **30. I am concerned that hormone replacement therapy may have addictive properties.** | **a. Strongly Agree** | | | | **b. Agree** | | | **c. Neutral** | | **d. Disagree** | | | | **e. Strongly Disagree** | |
| **31. I believe hormone replacement therapy is more effective than non-hormonal drug treatments.** | **a. Strongly Agree** | | | | **b. Agree** | | | **c. Neutral** | | **d. Disagree** | | | | **e. Strongly Disagree** | |
| **32. I believe hormone replacement therapy is safer than non-hormonal drug treatments.** | **a. Strongly Agree** | | | | **b. Agree** | | | **c. Neutral** | | **d. Disagree** | | | | **e. Strongly Disagree** | |
| **33. I believe that maintaining adequate communication with a doctor is necessary during the hormone replacement therapy process.** | **a. Strongly Agree** | | | | **b. Agree** | | | **c. Neutral** | | **d. Disagree** | | | | **e. Strongly Disagree** | |
| **Please select the option that best matches your behavior during hormone replacement therapy.** | | | | | | | | | | | | | | | |
| **34. Do you sometimes forget to take your medication?** | | | **a.Yes** | | | | | | **b.No** | | | | | | |
| **35. In the past two weeks, have you forgotten to take your medication for one or more days?** | | | **a.Yes** | | | | | | **b.No** | | | | | | |
| **36. During treatment, have you ever reduced your medication dosage or stopped taking the medication without informing your doctor when you felt your symptoms worsening or experiencing other symptoms?** | | | **a.Yes** | | | | | | **b.No** | | | | | | |
| **37. When you go on a trip or are away from home for an extended period, do you sometimes forget to carry your medication with you?** | | | **a.Yes** | | | | | | **b.No** | | | | | | |
| **38. Did you take your medication yesterday?** | | | **a.Yes** | | | | | | **b.No** | | | | | | |
| **39. Do you stop taking your medication when you feel your symptoms are under control?** | | | **a.Yes** | | | | | | **b.No** | | | | | | |
| **40. Do you find it challenging to adhere to the treatment plan?** | | | **a.Yes** | | | | | | **b.No** | | | | | | |
| **41. Do you find it difficult to remember to take your medication on time and in the correct dosage?** | | | **a. Never** | **b. Occasionally** | | **c. Sometimes** | | | | | **d. Often** | | **e. Always** | | |
